# Supplementary material for: Inhibition of Human Immunodeficiency Virus Type 1 Entry by a Keggin Polyoxometalate
Source: MDPI journal article supplement (doi:10.3390/v10050265), 2018-05-16
Supplement: s1 [file s1]

Table S1. Anti-HIV-1 activities of PT-1 in PBMCs from three donors

|        | D3               |                  | D5               |                  | D7               |                  | D9               |                  |
|--------|------------------|------------------|------------------|------------------|------------------|------------------|------------------|------------------|
|        | EC <sub>50</sub> | EC <sub>90</sub> | EC <sub>50</sub> | EC <sub>90</sub> | EC <sub>50</sub> | EC <sub>90</sub> | EC <sub>50</sub> | EC <sub>90</sub> |
|        | (nM)             | (nM)             | (nM)             | (nM)             | (nM)             | (nM)             | (nM)             | (nM)             |
| Donor1 | 74.1             | 7530.3           | 47.52            | 5676.63          | 3.95             | 3716.26          | 1.84             | 3490.97          |
| Donor2 | 15.45            | 3737.65          | 3.91             | 2146.26          | 1.66             | 1452.76          | 0.12             | 543.66           |
| Donor3 | 66.07            | 6009.95          | 15               | 4059.36          | 4.03             | 2331.23          | 1.23             | 1237.89          |

Table S2. Bone marrow micronucleus assay ( $x \pm SD$ )

| Group (mg/kg)  | Numbers | MNPCE/<br>1000 PCEs | PCE/<br>(PCE+NCE) |
|----------------|---------|---------------------|-------------------|
| Saline control | 5       | 0.2±0.44            | 41.3±4.6          |
| 200            | 5       | 0.4±0.89            | 40.1±3.3          |
| 600            | 5       | 0.4±0.54            | 42.4±2.8          |
| 1800           | 5       | 0.2±0.44            | 41.7±3.4          |
| CP control     | 5       | 16.2±11.6***        | 42.8±2.2          |

Abbreviations: CP, Cyclophosphamide, MN, Micronucleated, NCE, normochromatic erythrocytes, PCE, polychromatic erythrocytes, SD, Standard deviation

\*\*\*Significantly different from saline control at  $P < 0.001$

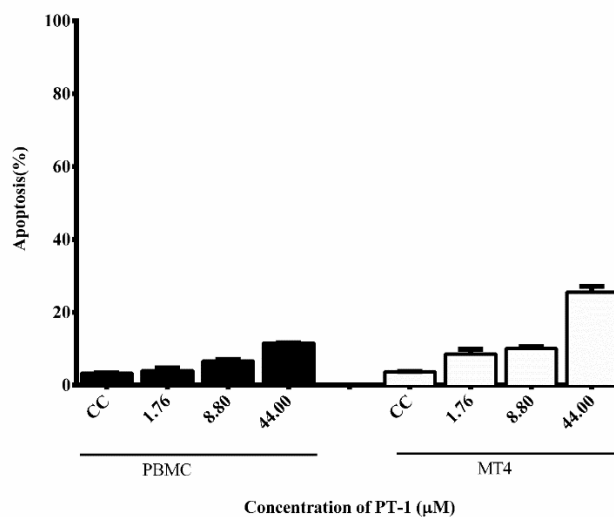

**Figure S1** Percentage of apoptotic cell. MT4 T cells and pre-stimulated PBMCs were co-cultured with PT-1 (1.76-44.00  $\mu\text{M}$ ) for 5 days. Cell were then collected and stained with Annexin-V-FITC/PI. Cell apoptosis rates were analyzed by FACS. Results were expressed as mean  $\pm$  SD.

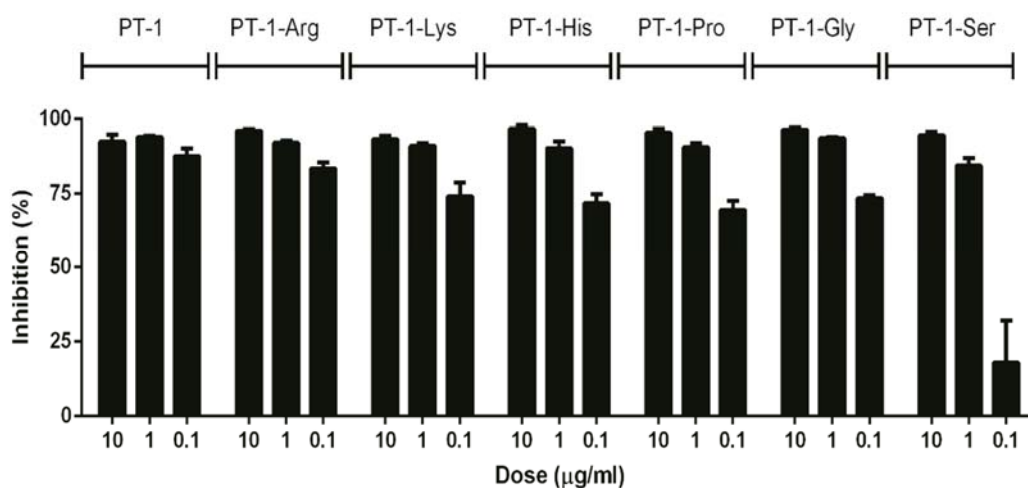

**Figure S2.** The anti-HIV activity of organic functionalized derivatives of PT-1. HIV-1 replication were evaluated by TZM-bl assays. PT-1 derivatives include Arginine (PT-1-Arg), Lysine (PT-1-Lys), Histidine (PT-1-His), Proline (PT-1-Pro), Glycine (PT-1-Gly) and Serine (PT-1-Ser) modified side-chains. The data were expressed mean  $\pm$  SD.

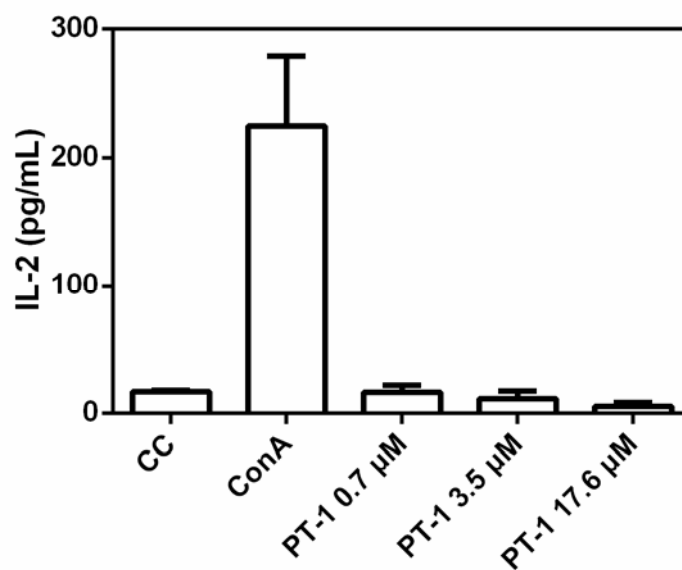

**Figure S3** PT-1 didn't induce IL-2 secretion. PBMCs were isolated and co-cultured with PT-1 (0.7, 3.5, 17.6  $\mu$ M) for 2 days. ConA (5  $\mu$ g/mL) served as positive control. The supernatant were collected and measured for IL-2 secretion by ELISA. Data were expressed mean  $\pm$  SD.
